# Supplementary material for: Development of an immune-related gene signature applying Ridge method for improving immunotherapy responses and clinical outcomes in lung adenocarcinoma
Source: PeerJ journal article supplement (doi:10.7717/peerj.19121), 2025-05-08
Supplement: RawData.zip [file Data analysis.xlsx]

## Sheet: PCR data analysis
		Cq	Cq Mean	target gene				expression	average		p value
Ctrl	GAPDH	17.9	17.9767	25.64	7.66333	7.78	-0.116667	1.08423	1.00335	0.0989922		BEAS-2B
Ctrl	GAPDH	18.13	17.9767	25.92	7.94333	7.78	0.163333	0.89296
Ctrl	GAPDH	17.9	17.9767	25.71	7.73333	7.78	-0.0466667	1.03288
si-NC	GAPDH	16.62	16.6233	24.36	7.73667	7.78	-0.0433333	1.03049	1.12077	0.109499	0.240339
si-NC	GAPDH	16.65	16.6233	24.09	7.46667	7.78	-0.313333	1.24258
si-NC	GAPDH	16.6	16.6233	24.28	7.65667	7.78	-0.123333	1.08925
si-BTNL9	GAPDH	17.61	17.8933	29.36	11.4667	7.78	3.68667	0.077661	0.0927441	0.0171265	0.00313242
si-BTNL9	GAPDH	18.03	17.8933	28.84	10.9467	7.78	3.16667	0.111362
si-BTNL9	GAPDH	18.04	17.8933	29.16	11.2667	7.78	3.48667	0.089209
Ctrl	GAPDH	18.07	18.0933	26.63	8.53667	8.71	-0.173333	1.12766	1.03587	0.315549		PC9
Ctrl	GAPDH	18.02	18.0933	26.43	8.33667	8.71	-0.373333	1.29534
Ctrl	GAPDH	18.19	18.0933	27.35	9.25667	8.71	0.546667	0.6846
si-NC	GAPDH	16.92	16.8667	25.67	8.80333	8.71	0.0933333	0.937354	0.934017	0.0934374	0.620343
si-NC	GAPDH	16.79	16.8667	25.83	8.96333	8.71	0.253333	0.838956
si-NC	GAPDH	16.89	16.8667	25.54	8.67333	8.71	-0.0366667	1.02574
si-BTNL9	GAPDH	20.4	20.6033	30.99	10.3867	8.71	1.67667	0.312805	0.308199	0.0319406	0.000391327
si-BTNL9	GAPDH	20.9	20.6033	31.18	10.5767	8.71	1.86667	0.274206
si-BTNL9	GAPDH	20.51	20.6033	30.88	10.2767	8.71	1.56667	0.337587
Ctrl	GAPDH	17.91	18.0433	23.48	5.43667	5.79	-0.353333	1.27751	1.01602	0.228523		H1395
Ctrl	GAPDH	18.21	18.0433	24.06	6.01667	5.79	0.226667	0.854607
Ctrl	GAPDH	18.01	18.0433	23.96	5.91667	5.79	0.126667	0.915945
si-NC	GAPDH	18.41	18.16	24.21	6.05	5.79	0.26	0.835088	0.883506	0.0459829	0.380549
si-NC	GAPDH	17.98	18.16	24.06	5.9	5.79	0.11	0.926588
si-NC	GAPDH	18.09	18.16	24.12	5.96	5.79	0.17	0.888843
si-BTNL9	GAPDH	16.79	16.86	26.6	9.74	5.79	3.95	0.0647041	0.0760519	0.0227447	1.07656e-05
si-BTNL9	GAPDH	16.86	16.86	26.68	9.82	5.79	4.03	0.0612138
si-BTNL9	GAPDH	16.93	16.86	25.94	9.08	5.79	3.29	0.102238

## Sheet: PCR raw data
Hole	Channel	CT	TM	Target gene	Sample name
A01	FAM	25.64	81	BTNL9	Ctrl/BEAS-2B
A02	FAM	25.92	81	BTNL9	Ctrl/BEAS-2B
A03	FAM	25.71	81	BTNL9	Ctrl/BEAS-2B
A04	FAM	24.36	88	BTNL9	si-NC/BEAS-2B
A05	FAM	24.09	88	BTNL9	si-NC/BEAS-2B
A06	FAM	24.28	88	BTNL9	si-NC/BEAS-2B
A07	FAM	29.36	81	BTNL9	si-BTNL9/BEAS-2B
A08	FAM	28.84	81	BTNL9	si-BTNL9/BEAS-2B
A09	FAM	29.16	81	BTNL9	si-BTNL9/BEAS-2B
B01	FAM	17.9	85	GAPDH	Ctrl/BEAS-2B
B02	FAM	18.13	85.5	GAPDH	Ctrl/BEAS-2B
B03	FAM	17.9	85	GAPDH	Ctrl/BEAS-2B
B04	FAM	16.62	85	GAPDH	si-NC/BEAS-2B
B05	FAM	16.65	85	GAPDH	si-NC/BEAS-2B
B06	FAM	16.6	85	GAPDH	si-NC/BEAS-2B
B07	FAM	17.61	85	GAPDH	si-BTNL9/BEAS-2B
B08	FAM	18.03	85.5	GAPDH	si-BTNL9/BEAS-2B
B09	FAM	18.04	85.5	GAPDH	si-BTNL9/BEAS-2B
C01	FAM	26.63	88	BTNL9	Ctrl/PC9
C02	FAM	26.43	88	BTNL9	Ctrl/PC9
C03	FAM	27.35	88	BTNL9	Ctrl/PC9
C04	FAM	25.67	86.5	BTNL9	si-NC/PC9
C05	FAM	25.83	86.5	BTNL9	si-NC/PC9
C06	FAM	25.54	86.5	BTNL9	si-NC/PC9
C07	FAM	30.99	85.5	BTNL9	si-BTNL9/PC9
C08	FAM	31.18	85.5	BTNL9	si-BTNL9/PC9
C09	FAM	30.88	86	BTNL9	si-BTNL9/PC9
D01	FAM	18.07	85.5	GAPDH	Ctrl/PC9
D02	FAM	18.02	85.5	GAPDH	Ctrl/PC9
D03	FAM	18.19	85.5	GAPDH	Ctrl/PC9
D04	FAM	16.92	85	GAPDH	si-NC/PC9
D05	FAM	16.79	85.5	GAPDH	si-NC/PC9
D06	FAM	16.89	85.5	GAPDH	si-NC/PC9
D07	FAM	20.4	84.5	GAPDH	si-BTNL9/PC9
D08	FAM	20.9	84.5	GAPDH	si-BTNL9/PC9
D09	FAM	20.51	84.5	GAPDH	si-BTNL9/PC9
E01	FAM	23.48	82	BTNL9	Ctrl/H1395
E02	FAM	24.06	82	BTNL9	Ctrl/H1395
E03	FAM	23.96	82	BTNL9	Ctrl/H1395
E04	FAM	24.21	82	BTNL9	si-NC/H1395
E05	FAM	24.06	82	BTNL9	si-NC/H1395
E06	FAM	24.12	82	BTNL9	si-NC/H1395
E07	FAM	26.6	88	BTNL9	si-BTNL9/H1395
E08	FAM	26.68	88	BTNL9	si-BTNL9/H1395
E09	FAM	25.94	88.5	BTNL9	si-BTNL9/H1395
F01	FAM	17.91	85.5	GAPDH	Ctrl/H1395
F02	FAM	18.21	85.5	GAPDH	Ctrl/H1395
F03	FAM	18.01	85.5	GAPDH	Ctrl/H1395
F04	FAM	18.41	85.5	GAPDH	si-NC/H1395
F05	FAM	17.98	85.5	GAPDH	si-NC/H1395
F06	FAM	18.09	85.5	GAPDH	si-NC/H1395
F07	FAM	16.79	85.5	GAPDH	si-BTNL9/H1395
F08	FAM	16.86	85.5	GAPDH	si-BTNL9/H1395
F09	FAM	16.93	85.5	GAPDH	si-BTNL9/H1395

## Sheet: WB
BEAS-2B					PC9						H1395
Ctrl	si-NC	si-BTNL9			Ctrl	si-NC	si-BTNL9				Ctrl	si-NC	si-BTNL9
0.334544	0.323255	0.0284906			0.635732	0.728536	0.126281				0.613303	0.619036	0.154042
0.369177	0.310622	0.0113057			0.785314	0.754223	0.276741				0.450116	0.46386	0.27706
0.341925	0.385091	0.0509152			0.63956	0.649332	0.281436				0.520322	0.439277	0.252166
	BTNL9	GAPDH	BTNL9/GAPDH			BTNL9	GAPDH	BTNL9/GAPDH				BTNL9	GAPDH	BTNL9/GAPDH
CTRL	241000	720383	0.334544		CTRL	369272	580861	0.635732			CTRL	398469	649710	0.613303
CTRL	245059	663799	0.369177		CTRL	507736	646539	0.785314			CTRL	349758	777039	0.450116
CTRL	232619	680321	0.341925		CTRL	392910	614344	0.63956			CTRL	375806	722256	0.520322
si-NC	220590	682403	0.323255		si-NC	383146	525912	0.728536			si-NC	416235	672392	0.619036
si-NC	218439	703232	0.310622		si-NC	465808	617600	0.754223			si-NC	332527	716869	0.46386
si-NC	264158	685962	0.385091		si-NC	401934	618996	0.649332			si-NC	330051	751350	0.439277
si-BTNL9	19889	698089	0.0284906		si-BTNL9	75923	601224	0.126281			si-BTNL9	111118	721349	0.154042
si-BTNL9	8343	737948	0.0113057		si-BTNL9	176503	637791	0.276741			si-BTNL9	206940	746913	0.27706
si-BTNL9	35520	697630	0.0509152		si-BTNL9	186994	664428	0.281436			si-BTNL9	201348	798474	0.252166
