# Supplementary material for: Development of an immune-related gene signature applying Ridge method for improving immunotherapy responses and clinical outcomes in lung adenocarcinoma
Source: PeerJ journal article supplement (doi:10.7717/peerj.19121), 2025-05-08
Supplement: RawData.zip [file PCR.xlsx]

## Sheet: Cell PCR quantification
SEMA7A(0.093)																			SEMA7A(0.093)							SEMA7A(0.093)
BEAS-2B			PC-9			H1395			BEAS-2B(si)			PC-9(si)			H1395(si)				BEAS-2B	PC-9	H1395	BEAS-2B(si)	PC-9(si)	H1395(si)		BEAS-2B	PC-9	H1395	BEAS-2B(si)	PC-9(si)	H1395(si)
11.22	35.59	24.37	11.32	32.05	20.73	11.16	32.61	21.45	11.34	35.75	24.41	11.04	35.61	24.57	11.08	35.31	24.23		0	-3.64	-2.92	0.04	0.2	-0.14		1	12.4666	7.56846	0.972655	0.870551	1.10191
11.44	36.03	24.59	11.88	32.94	21.06	11.66	32.92	21.26	11.66	36.48	24.82	11.51	35.78	24.27	11.49	36.17	24.68		0.22	-3.31	-3.11	0.45	-0.1	0.31		0.858565	9.91766	8.63383	0.732043	1.07177	0.806642
11.63	35.93	24.3	11.36	32.89	21.53	11.29	32.8	21.51	11.23	36.1	24.87	11.48	35.35	23.87	11.48	35.31	23.83		-0.07	-2.84	-2.86	0.5	-0.5	-0.54		1.04972	7.1602	7.26015	0.707107	1.41421	1.45397
EFHD2(0.145)																			EFHD2(0.145)							EFHD2(0.145)
BEAS-2B			PC-9			H1395			BEAS-2B(si)			PC-9(si)			H1395(si)				BEAS-2B	PC-9	H1395	BEAS-2B(si)	PC-9(si)	H1395(si)		BEAS-2B	PC-9	H1395	BEAS-2B(si)	PC-9(si)	H1395(si)
11.22	27.23	16.01	11.32	25.8	14.48	11.16	25.95	14.79	11.34	27.4	16.06	11.04	27.1	16.06	11.08	27.22	16.14		0	-1.53	-1.22	0.05	0.05	0.13		1	2.88786	2.32947	0.965936	0.965936	0.913831
11.44	27.29	15.85	11.88	25.72	13.84	11.66	25.44	13.78	11.66	28.05	16.39	11.51	27.41	15.9	11.49	27.83	16.34		-0.16	-2.17	-2.23	0.38	-0.11	0.33		1.11729	4.50023	4.69134	0.768438	1.07923	0.795536
11.63	27.08	15.45	11.36	25.48	14.12	11.29	25.41	14.12	11.23	27.75	16.52	11.48	27.52	16.04	11.48	27.42	15.94		-0.56	-1.89	-1.89	0.51	0.03	-0.07		1.47427	3.70635	3.70635	0.702222	0.97942	1.04972
CHST11(0.108)																			CHST11(0.108)							CHST11(0.108)
BEAS-2B			PC-9			H1395			BEAS-2B(si)			PC-9(si)			H1395(si)				BEAS-2B	PC-9	H1395	BEAS-2B(si)	PC-9(si)	H1395(si)		BEAS-2B	PC-9	H1395	BEAS-2B(si)	PC-9(si)	H1395(si)
11.22	24.06	12.84	11.32	22.8	11.48	11.16	22.22	11.06	11.34	24.59	13.25	11.04	24.16	13.12	11.08	24.12	13.04		0	-1.36	-1.78	0.41	0.28	0.2		1	2.56685	3.43426	0.752623	0.823591	0.870551
11.44	24.6	13.16	11.88	22.66	10.78	11.66	22.32	10.66	11.66	24.57	12.91	11.51	24.35	12.84	11.49	24.94	13.45		0.32	-2.06	-2.18	0.07	0	0.61		0.80107	4.16986	4.53154	0.952638	1	0.655197
11.63	24.5	12.87	11.36	22.28	10.92	11.29	22.13	10.84	11.23	24.09	12.86	11.48	24.46	12.98	11.48	24.82	13.34		0.03	-1.92	-2	0.02	0.14	0.5		0.97942	3.78423	4	0.986233	0.907519	0.707107
SLC24A4(-0.502)																			SLC24A4(-0.502)							SLC24A4(-0.502)
BEAS-2B			PC-9			H1395			BEAS-2B(si)			PC-9(si)			H1395(si)				BEAS-2B	PC-9	H1395	BEAS-2B(si)	PC-9(si)	H1395(si)		BEAS-2B	PC-9	H1395	BEAS-2B(si)	PC-9(si)	H1395(si)
11.22	25.18	13.96	11.32	27.76	16.44	11.16	27.47	16.31	11.34	25.18	13.84	11.04	25.14	14.1	11.08	25.05	13.97		0	2.48	2.35	-0.12	0.14	0.01		1	0.179244	0.196146	1.08673	0.907519	0.993092
11.44	25.03	13.59	11.88	27.53	15.65	11.66	27.35	15.69	11.66	25.38	13.72	11.51	25.18	13.67	11.49	25.62	14.13		-0.37	1.69	1.73	-0.24	-0.29	0.17		1.29235	0.309927	0.301452	1.18099	1.22264	0.888843
11.63	25.68	14.05	11.36	27.49	16.13	11.29	27.1	15.81	11.23	25.11	13.88	11.48	25.56	14.08	11.48	25.53	14.05		0.09	2.17	1.85	-0.08	0.12	0.09		0.939523	0.222211	0.277392	1.05702	0.920188	0.939523
MAL(-0.089)																			MAL(-0.089)							MAL(-0.089)
BEAS-2B			PC-9			H1395			BEAS-2B(si)			PC-9(si)			H1395(si)				BEAS-2B	PC-9	H1395	BEAS-2B(si)	PC-9(si)	H1395(si)		BEAS-2B	PC-9	H1395	BEAS-2B(si)	PC-9(si)	H1395(si)
11.22	26.63	15.41	11.32	27.88	16.56	11.16	28.19	17.03	11.34	26.93	15.59	11.04	26.63	15.59	11.08	26.58	15.5		0	1.15	1.62	0.18	0.18	0.09		1	0.450625	0.325335	0.882703	0.882703	0.939523
11.44	26.61	15.17	11.88	28.77	16.89	11.66	27.95	16.29	11.66	26.84	15.18	11.51	26.85	15.34	11.49	26.31	14.82		-0.24	1.48	0.88	-0.23	-0.07	-0.59		1.18099	0.358489	0.543367	1.17283	1.04972	1.50525
11.63	26.77	15.14	11.36	27.87	16.51	11.29	27.41	16.12	11.23	26.06	14.83	11.48	26.57	15.09	11.48	26.6	15.12		-0.27	1.1	0.71	-0.58	-0.32	-0.29		1.20581	0.466516	0.61132	1.49485	1.24833	1.22264
JCHAIN(-0.074)																			JCHAIN(-0.074)							JCHAIN(-0.074)
BEAS-2B			PC-9			H1395			BEAS-2B(si)			PC-9(si)			H1395(si)				BEAS-2B	PC-9	H1395	BEAS-2B(si)	PC-9(si)	H1395(si)		BEAS-2B	PC-9	H1395	BEAS-2B(si)	PC-9(si)	H1395(si)
11.23	32.02	20.79	11.47	34.09	22.62	11.77	34.47	22.7	11.38	32.35	20.97	11.05	32.07	21.02	11.46	32.63	21.17		0	1.83	1.91	0.18	0.23	0.38		1	0.281265	0.266093	0.882703	0.852635	0.768438
11.69	32.07	20.38	11.81	34.41	22.6	11.61	34.94	23.33	11.73	32.87	21.14	11.56	32.69	21.13	11.2	32.4	21.2		-0.41	1.81	2.54	0.35	0.34	0.41		1.32869	0.285191	0.171943	0.784584	0.790041	0.752623
11.62	32.96	21.34	11.16	34.25	23.09	11.55	34.67	23.12	11.17	32.95	21.78	11.22	32.5	21.28	11.62	32.35	20.73		0.55	2.3	2.33	0.99	0.49	-0.06		0.68302	0.203063	0.198884	0.503478	0.712025	1.04247
SCARF1(-0.128)																			SCARF1(-0.128)							SCARF1(-0.128)
BEAS-2B			PC-9			H1395			BEAS-2B(si)			PC-9(si)			H1395(si)				BEAS-2B	PC-9	H1395	BEAS-2B(si)	PC-9(si)	H1395(si)		BEAS-2B	PC-9	H1395	BEAS-2B(si)	PC-9(si)	H1395(si)
11.23	29.95	18.72	11.47	32.01	20.54	11.77	32.15	20.38	11.38	29.86	18.48	11.05	29.49	18.44	11.46	29.99	18.53		0	1.82	1.66	-0.24	-0.28	-0.19		1	0.283221	0.316439	1.18099	1.21419	1.14076
11.69	29.63	17.94	11.81	32.96	21.15	11.61	32.87	21.26	11.73	29.65	17.92	11.56	29.49	17.93	11.2	29.86	18.66		-0.78	2.43	2.54	-0.8	-0.79	-0.06		1.71713	0.185565	0.171943	1.7411	1.72907	1.04247
11.62	29.09	17.47	11.16	32.96	21.8	11.55	32.1	20.55	11.17	29.96	18.79	11.22	29.56	18.34	11.62	29.22	17.6		-1.25	3.08	1.83	0.07	-0.38	-1.12		2.37841	0.118257	0.281265	0.952638	1.30134	2.17347
