# Supplementary material for: Development of an immune-related gene signature applying Ridge method for improving immunotherapy responses and clinical outcomes in lung adenocarcinoma
Source: PeerJ. 2025 May 8;13:e19121. doi: 10.7717/peerj.19121 (PMC12066106; doi:10.7717/peerj.19121)
Supplement: Supplemental Information 10 [file peerj-13-19121-s010.xls]

## Sheet: Sheet1
ITEM TO CHECK	IMPORTANCE	CHECKLIST
EXPERIMENTAL DESIGN
Definition of experimental and control groups	E	P9L192-193
Number within each group	E	P9L192-193
Assay carried out by core lab or investigator's lab?	D	Not Applicable
Acknowledgement of authors' contributions	D	Not Applicable
SAMPLE
Description	E	P10L199-205
Volume/mass of sample processed	D	Not Applicable
Microdissection or macrodissection	E	P10L199-205
Processing procedure	E	P10L199-205
If frozen - how and how quickly?	E	P10L199-205
If fixed - with what, how quickly?	E	P10L199-205
Sample storage conditions and duration (especially for FFPE samples)	E	P10L199-205
NUCLEIC ACID EXTRACTION
Procedure and/or instrumentation	E	P10L199-205
Name of kit and details of any modifications	E	P10L199-205
Source of additional reagents used	D	Not Applicable
Details of DNase or RNAse treatment	E	P10L199-205
Contamination assessment (DNA or RNA)	E	P10L199-205
Nucleic acid quantification	E	P10L199-205
Instrument and method	E	P10L199-205
Purity (A260/A280)	D	Not Applicable
Yield	D	Not Applicable
RNA integrity method/instrument	E	P10L199-205
RIN/RQI or Cq of 3' and 5' transcripts	E	P10L199-205
Electrophoresis traces	D	Not Applicable
Inhibition testing (Cq dilutions, spike or other)	E	P10L199-205
REVERSE TRANSCRIPTION
Complete reaction conditions	E	P10L199-205
Amount of RNA and reaction volume	E	P10L199-205
Priming oligonucleotide (if using GSP) and concentration	E	P10L199-205
Reverse transcriptase and concentration	E	P10L199-205
Temperature and time	E	P10L199-205
Manufacturer of reagents and catalogue numbers	D	Not Applicable
Cqs with and without RT	D*	Not Applicable
Storage conditions of cDNA	D	Not Applicable
qPCR TARGET INFORMATION
If multiplex, efficiency and LOD of each assay.	E	P10L199-205
Sequence accession number	E	P10L199-205
Location of amplicon	D	Not Applicable
Amplicon length	E	P10L199-205
In silico specificity screen (BLAST, etc)	E	P10L199-205
Pseudogenes, retropseudogenes or other homologs?	D	Not Applicable
Sequence alignment	D	Not Applicable
Secondary structure analysis of amplicon	D	Not Applicable
Location of each primer by exon or intron (if applicable)	E	P10L199-205
What splice variants are targeted?	E	P10L199-205
qPCR OLIGONUCLEOTIDES
Primer sequences	E	P10L199-205
RTPrimerDB Identification Number	D	Not Applicable
Probe sequences	D**	Not Applicable
Location and identity of any modifications	E	P10L199-205
Manufacturer of oligonucleotides	D	Not Applicable
Purification method	D	Not Applicable
qPCR PROTOCOL
Complete reaction conditions	E	P10L199-205
Reaction volume and amount of cDNA/DNA	E	P10L199-205
Primer, (probe), Mg++ and dNTP concentrations	E	P10L199-205
Polymerase identity and concentration	E	P10L199-205
Buffer/kit identity and manufacturer	E	P10L199-205
Exact chemical constitution of the buffer	D	Not Applicable
Additives (SYBR Green I, DMSO, etc.)	E	P10L199-205
Manufacturer of plates/tubes and catalog number	D	Not Applicable
Complete thermocycling parameters	E	P10L199-205
Reaction setup (manual/robotic)	D	Not Applicable
Manufacturer of qPCR instrument	E	P10L199-205
qPCR VALIDATION
Evidence of optimisation (from gradients)	D	Not Applicable
Specificity (gel, sequence, melt, or digest)	E	P10L199-205
For SYBR Green I, Cq of the NTC	E	P10L199-205
Standard curves with slope and y-intercept	E	P10L199-205
PCR efficiency calculated from slope	E	P10L199-205
Confidence interval for PCR efficiency or standard error	D	Not Applicable
r2 of standard curve	E	P10L199-205
Linear dynamic range	E	P10L199-205
Cq variation at lower limit	E	P10L199-205
Confidence intervals throughout range	D	Not Applicable
Evidence for limit of detection	E	P10L199-205
If multiplex, efficiency and LOD of each assay.	E	P10L199-205
DATA ANALYSIS
qPCR analysis program (source, version)	E	P10L199-205
Cq method determination	E	P10L199-205
Outlier identification and disposition	E	P10L199-205
Results of NTCs	E	P10L199-205
Justification of number and choice of reference genes	E	P10L199-205
Description of normalisation method	E	P10L199-205
Number and concordance of biological replicates	D	Not Applicable
Number and stage (RT or qPCR) of technical replicates	E	P10L199-205
Repeatability (intra-assay variation)	E	P10L199-205
Reproducibility (inter-assay variation, %CV)	D	Not Applicable
Power analysis	D	Not Applicable
Statistical methods for result significance	E	P10L199-205
Software (source, version)	E	P10L199-205
Cq or raw data submission using RDML	D	Not Applicable
Table 1. MIQE checklist for authors, reviewers and editors. All essential information (E) must be submitted with the manuscript. Desirable
information (D) should be submitted if available. If using primers obtained from RTPrimerDB, information on qPCR target, oligonucleotides,
protocols and validation is available from that source.
*: Assessing the absence of DNA using a no RT assay is essential when first extracting RNA. Once the sample has been validated as
RDNA-free, inclusion of a no-RT control is desirable, but no longer essential.
**: Disclosure of the probe sequence is highly desirable and strongly encouraged. However, since not all commercial pre-designed assay
vendors provide this information, it cannot be an essential requirement. Use of such assays is advised against.
